# Supplementary material for: Single-cell isolation by a modular single-cell pipette for RNA-sequencing
Source: Royal Society of Chemistry journal article supplement (doi:10.1039/c6lc01241h), 2016-01-01
Supplement: c6lc01241h1.pdf [file c6lc01241h1.pdf]

## Electronic Supplementary Information

### Single-Cell Isolation by Modular Single-Cell Pipette for RNA-Sequencing

Kai Zhang<sup>ab</sup>, Min Gao<sup>c</sup>, Zechen Chong<sup>d</sup>, Ying Li<sup>ab</sup>, Xin Han<sup>ab</sup>, Rui Chen<sup>c</sup> and Lidong Qin<sup>\*abe</sup>

<sup>a</sup>Department of Nanomedicine, Houston Methodist Research Institute, Houston, TX 77030, USA

<sup>b</sup>Department of Cell and Developmental Biology, Weill Medical College of Cornell University, New York, NY 10065, USA

<sup>c</sup>Human Genome Sequencing Center, Department of Molecular and Human Genetics, Baylor College of Medicine, Houston, TX 77030, USA

<sup>d</sup>Department of Bioinformatics and Computational Biology, The University of Texas MD Anderson Cancer Center, Houston, TX 77030, USA

<sup>e</sup>Department of Molecular and Cellular Oncology, The University of Texas MD Anderson Cancer Center, Houston, TX 77030, USA

\*lqin@houstonmethodist.org

The Supporting Information includes:

Figures S1-S6

Movie S1 showing the mSCP for single-cell isolation with 3 times acceleration.

Movie S2 showing single-cell capture by applying negative pressure and single-cell release by applying positive pressure.

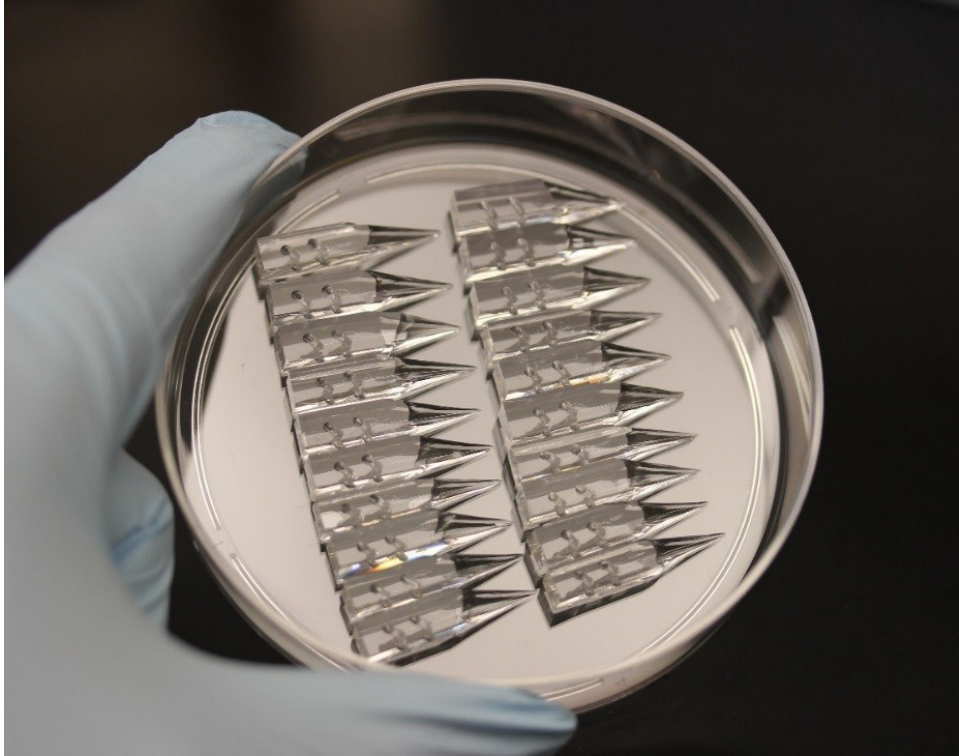

**Figure S1.** 20 SCP-Tips are laid on a Petri dish with 9 mm in diameter.

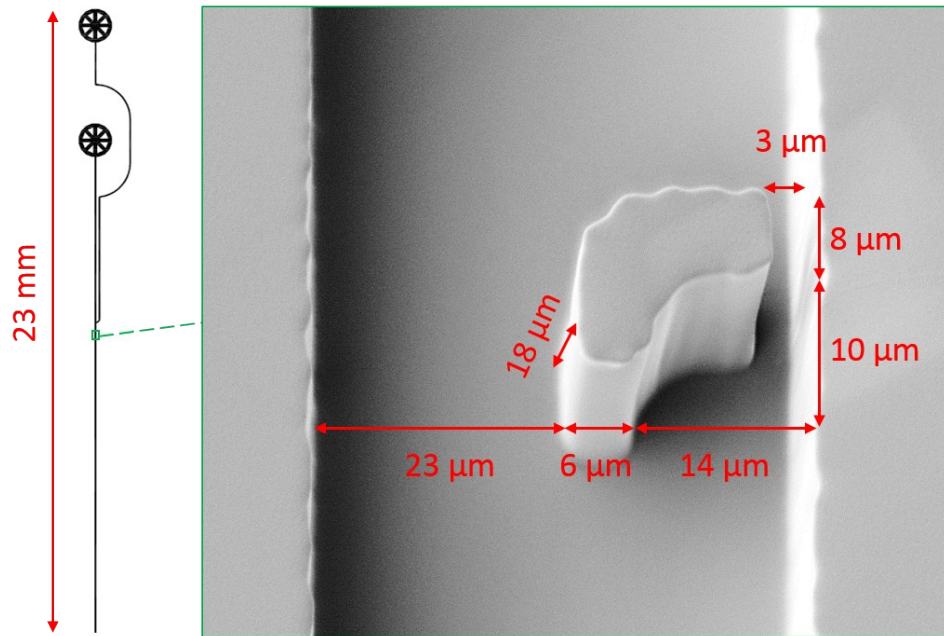

**Figure S2.** Detailed dimensions of SCP-Tip containing a hook.

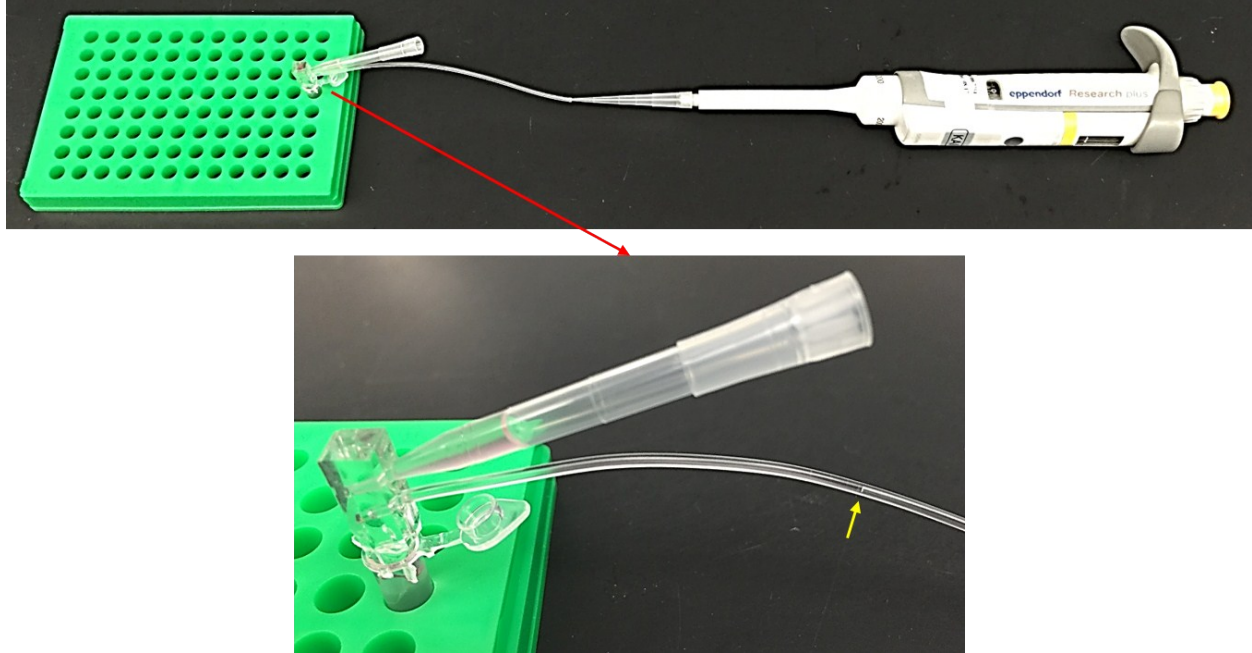

**Figure S3.** Operational process for evaluating the relationship between applied negative pressure and average liquid velocity. The gas-liquid interface into the microtubing is clear and indicated by the yellow arrow in the magnified photograph. The inner diameter of the microtubing is 500  $\mu\text{m}$ . The average liquid velocity within the microtubing ( $v_t$ , m/s) is calculated according to the Equation 1:  $v_t = l/t$ , where  $l$  is the increased liquid length (m) and  $t$  is time (s). The average liquid velocity within the microchannels (m/s) ( $v_c$ ) is calculated according to the Equation 2:  $v_c = \Phi \cdot v_t \cdot \pi \cdot r^2 / (w \cdot h)$ , where  $\Phi$  is fluid resistance-based correction factor (0.4 in SCP-Tip containing a hook and 0.5 in SCP-Tip containing a hydrodynamic trap),  $r$  is radius of microtubing (m),  $w$  is width of microchannel (m), and  $h$  is height of microchannel (m).

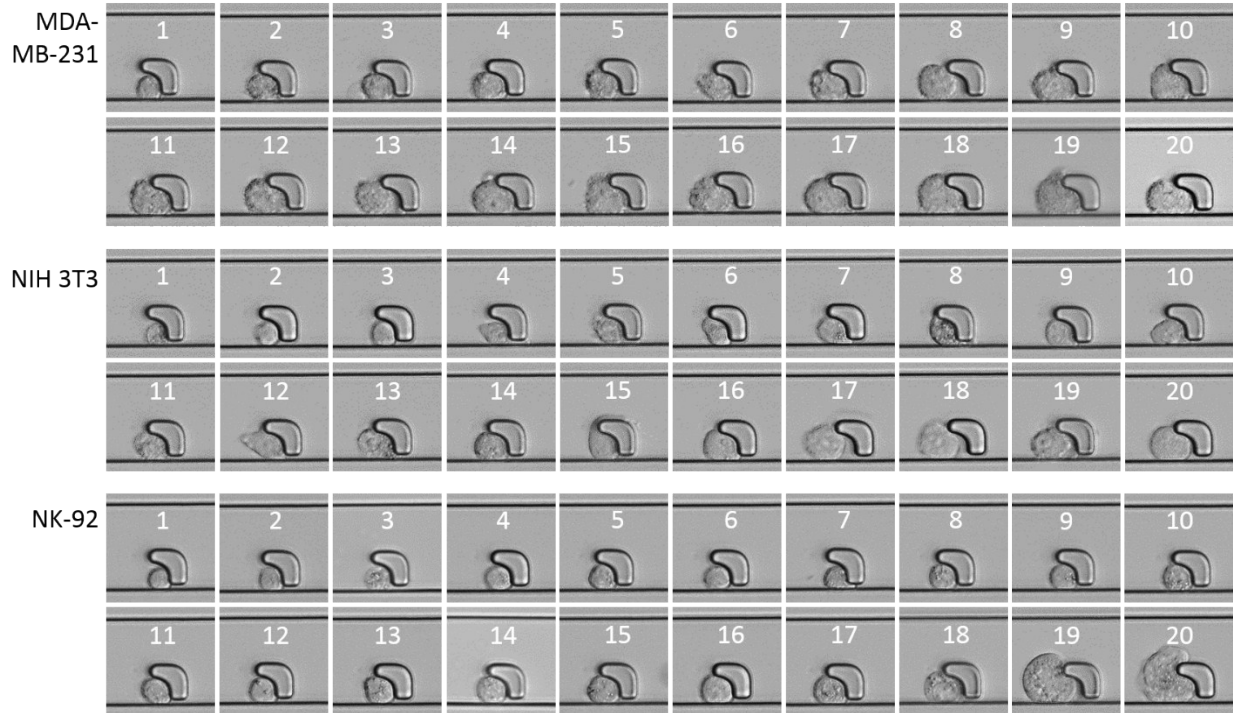

**Figure S4.** Single-cell capture by hook, including MDA-MB-231(breast cancer cell) with diameter of 12-20  $\mu\text{m}$ , NIH 3T3 (fibroblast) with diameter of 10-18  $\mu\text{m}$ , and NK-92 (natural killer cell) with diameter of 9-24  $\mu\text{m}$ . For each cell type, 20 single cells are randomly captured. Micrographs are arrayed according to the size of single cells.

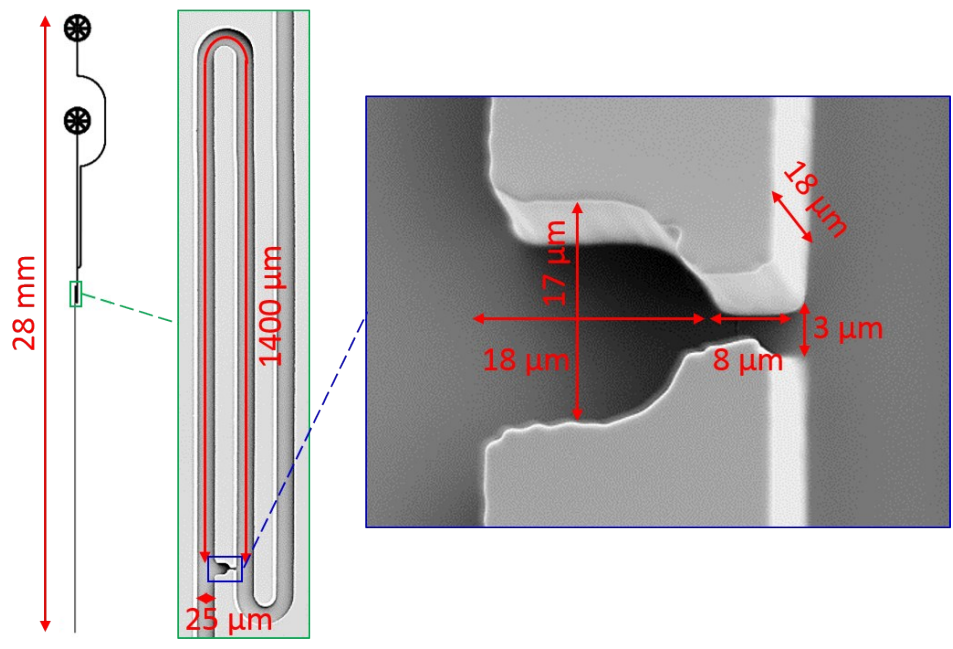

**Figure S5.** Detailed dimensions of SCP-Tip containing a hydrodynamic trap.

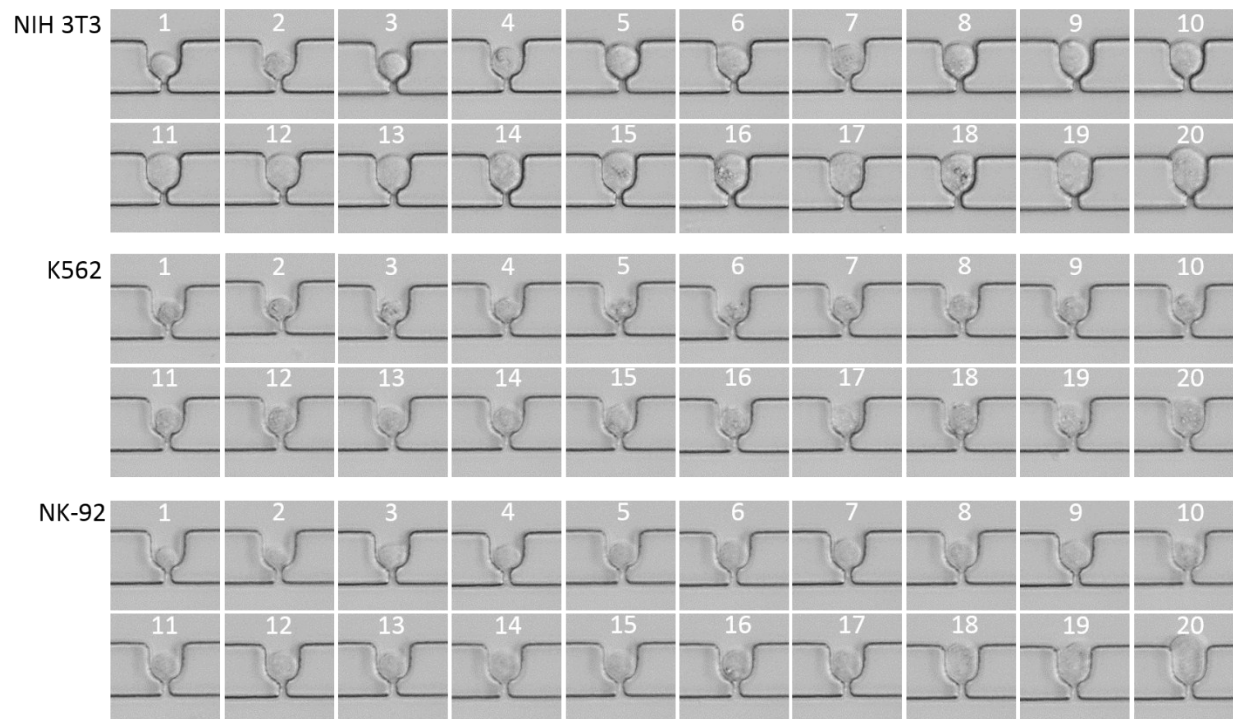

**Figure S6.** Single-cell capture by hydrodynamic trap, including NIH 3T3 with diameter of 13-18  $\mu\text{m}$ , K562 (lymphoblast) with diameter of 12-17  $\mu\text{m}$ , and NK-92 with diameter of 11-20  $\mu\text{m}$ . For each cell type, 20 single cells are randomly captured. Micrographs are arrayed according to the size of single cells.
